# Supplementary material for: Towards Sustainable Development in Education: Implementing a VET System for In-Service Teachers in Albania
Source: MDPI journal article supplement (doi:10.3390/su13168739), 2021-08-05
Supplement: s1 [file s1]

STUDENT COURSE EVALUATION QUESTIONNAIRE /PYETËSOR VLERËSIMI I LËNDËS NGA STUDENTI

Dear student, after course completion, please, give us your views so that Course quality can be improved. You are encouraged to be frank and constructive in your comments. Thank you

I nderuar student, pas përfundimit të kursit, ju lutemi, na jepni pikëpamjet tuaja në mënyrë që të përmirësohet cilësia e kursit. Ne ju inkurajojmë që të jeni të sinqertë dhe konstruktiv në komentet tuaja. Faleminderit!

\*Obligatorio

1. \* Marca solo un óvalo.

☐ Opción 1

2. \* Marca solo un óvalo.

☐ Opción 1

1. Background information/ Informacione të përgjithshme

3. 1.1. Sex/Seks \* Marca solo un óvalo.

☐ Female/ Femër

☐ Male/Mashkull

4. 1.2. Age group/Mosha: \* Marca solo un óvalo.

☐ 18-25

☐ 26-35

☐ 36-45

☐ 46-55

☐ 56+

5. 1.3. Year(s) working as a teacher in total/ Vit/et në total si mësues/e: \*

6. 1.4. Year(s) working as a teacher in your current school/high school/Viti/et si mësues në shkollën që jeni aktualisht: \*

7. 1.5. What school level do you teach in your current school/high school/Në cfarë klasë jepni mësim aktualisht? \*

Selecciona todos las que correspondan.

☐ Preschool/ Parashkollor

☐ Primary school/ Shkollë fillore

☐ Lower secondary (compulsory school)/Arsimi i mesëm i ulët

☐ Upper secondary/ Arsimi i mesëm i lartë

8. 1.6. Select your main subject field/ Zgjidhni profilin tuaj lëndor: \* Marca solo un óvalo.

☐ Primary education/ Arsim fillor

☐ National language/Literature/ Gjuhë amtare/Letërsi

☐ Foreign language/ Gjuhë të huaja

☐ Mathematics/ Matematikë

☐ Physics/ Fizikë

☐ Chemistry/ Kimi

☐ Biology/ Biologji

☐ History/ Histori

☐ Geography/ Gjeografi

☐ Social Sciences/ Shkenca Sociale

☐ ICT/ TIK

☐ Arts/ Arte

☐ Physical education, sport and health/ Edukim fizik, sporte dhe shëndeti

2. About the course you attended/ Rreth modulit që ndoqët

9. 2.1. Course title/ Titulli i modulit: \* Marca solo un óvalo.

☐ Blended learning with Learning Management Systems/ Shkrimja e të mësuarit me sistemet manaxheriale të të mësuarit

☐ Digital tools for learning/teaching/ Mjetet digjitale në mësimdhënie dhe mësimxënie

☐ Teaching methodology/ Metodologjia e mësimdhënies

☐ Classroom management/ Menaxhimi i klasës

☐ Project-based teaching and learning/ Mësimdhënia dhe të mësuarit me projekte

☐ Revised assessment of students learning outcomes/ Vlerësimi i rishikuar i rezultateve të të nxënit

☐ Active citizenship in a global society/ Qytetaria aktive në një shoqëri globale

☐ Basic skills for active citizenship/ Qytësitë bazë për një qytetari aktive

☐ Media Literacy and online communication/ Njohuri rreth teknologjisë dhe komunikimi online

☐ Media Literacy in a digitalized world/ Njohuri rreth teknologjisë në një botë të digjitalizuar

☐ Inclusive classroom strategies/ Strategjitë për një klase gjithëpërfshirëse

☐ Learning Design for all: Instructional formats and learning modalities/ Planifikimi i mësimdhënies për të gjithë: Formate udhëzuese dhe modalitete të të mësuarit

☐ Learning and assessment culture in Albania/ Kultura e të mësuarit dhe të vlerësuarit në Shqipëri

☐ Foster critical thinking through media analysis/ Nxitja e të menduarit kritik përmes analizës mediatike

☐ Communication and conflict management/ Menaxhimi i komunikimit dhe konflikteve

☐ Psychology of child development/ Psikologjia e zhvillimit të fëmijëve

10. 2.2. University in which you attended the course/ Universiteti në të cilin keni ndjekur këtë modul: \* Marca solo un óvalo.

☐ Sports University of Tirana (SUT)/ Universiteti i Tiranës

☐ University "Aleksander Moisiu" Durres (UAMD)/ Universiteti "Aleksander Moisiu", Durrës

☐ University of Elbasan (UNIEL)/ Universiteti i Elbasanit

☐ University of Gjirokastra (UÇUG)/ Universiteti i Gjirokastrës

☐ University "Fan S. Noli" (UNIKO)/ Universiteti Fan S.Noli

☐ University of Shkodra (UNISHK)/ Universiteti i Shkodrës

☐ University College "Pavarësia Vlorë" (KUPV)/ Kolegji Universitar "Pavarsia Vlorë"

☐ University of Vlora (UNIVL)/ Universiteti i Vlorës

2.3. Please, indicate your level of agreement with the following statements/ Ju lutem tregoni sa pajtoheni me deklaratat e mëposhtme.

11. COURSE CONTENT AND ORGANISATION/ PËRMBAJTJA E MODULIT DHE ORGANIZIMI \* (1: Strongly disagree/ Nuk pajtohem aspak, 2: Disagree/ Nuk pajtohem, 3: Uncertain/ Jam i/e pasigurtë 4: Agree/ Pajtohem, 5: Strongly agree/ Pajtohem plotësisht)

Marca solo un óvalo por fila.

Not applicable/E paaplikueshme 1 2 3 4 5

The course learning outcomes were clear/ Rezultatet e të nxënit për modulin ishin të qarta ☐ ☐ ☐ ☐ ☐ ☐

The course syllabus (content) was explained at the beginning of the course/Programi mësimor i modulit (përmbajtja) është shpjeguar në fillim të modulit ☐ ☐ ☐ ☐ ☐ ☐

The course was delivered as outlined in the syllabus/ Moduli u ofrua sipas programit ☐ ☐ ☐ ☐ ☐ ☐

The course was well organised (e.g. timely access to materials, notification of changes, etc.)/ Trajnimi ishte i organizuar mire (psh; qasja në kohë me materialet; njoftimet për ndryshime.etj) ☐ ☐ ☐ ☐ ☐ ☐

The amount of workload/homework was manageable/ Sasia e punës/detyrave të shtëpisë ishte e menaxhueshme ☐ ☐ ☐ ☐ ☐ ☐

12. LEARNING RESOURCES AND FACILITIES/ MATERIALET BURIMORE DHE LEHTËSI TË TJERA \* (1: Strongly disagree/ Nuk pajtohem aspak, 2: Disagree/ Nuk pajtohem, 3: Uncertain/ Jam i/e pasigurtë 4: Agree/ Pajtohem, 5: Strongly agree/ Pajtohem plotësisht)

Marca solo un óvalo por fila.

Not applicable/E paaplikueshme 1 2 3 4 5

Classrooms were satisfactory (space, light, ventilation, etc.)/ Ambientet ishin të kënaqshme (hapësira, dritat, ajrosja, etj) ☐ ☐ ☐ ☐ ☐ ☐

Equipment for learning was appropriate (computers, internet, etc.)/ Pajisjet mësimore ishin të përshtatshme (kompjuterat, interneti, etj) ☐ ☐ ☐ ☐ ☐ ☐

Learning documents were useful (lesson plans, course notes, ppt, etc.)/ Materialet e orës mësimore ishin të dobishme (planet mësimore, shënime, prezantimet powerpoint, etj) ☐ ☐ ☐ ☐ ☐ ☐

13. ATTENDANTS' PARTICIPATION/ PREZENCA E PJESMARRËSVE \* (1: Strongly disagree/ Nuk pajtohem aspak, 2: Disagree/ Nuk pajtohem, 3: Uncertain/ Jam i/e pasigurtë 4: Agree/ Pajtohem, 5: Strongly agree/ Pajtohem plotësisht)

Marca solo un óvalo por fila.

Not applicable/E paaplikueshme 1 2 3 4 5

I participated actively in the course/ Unë isha aktiv/e gjatë modulit ☐ ☐ ☐ ☐ ☐ ☐

Attendants participated actively in the course/ Pjesmarrësit morrën pjesë në mënyrë aktive përgjatë modulit. ☐ ☐ ☐ ☐ ☐ ☐

14. TEACHING METHODS/ METODAT E MËSIMDHËNIES \* (1: Strongly disagree/ Nuk pajtohem aspak, 2: Disagree/ Nuk pajtohem, 3: Uncertain/ Jam i/e pasigurtë 4: Agree/ Pajtohem, 5: Strongly agree/ Pajtohem plotësisht)

Marca solo un óvalo por fila.

Not applicable/E paaplikueshme 1 2 3 4 5

Contents were presented clearly/ Përmbajtja u prezantua qartësisht ☐ ☐ ☐ ☐ ☐ ☐

The pace of the course was appropriate/ Ritmi i modulit ishte i përshtatshëm ☐ ☐ ☐ ☐ ☐ ☐

The course stimulated my interest in the subject area/ Moduli nxiti interesin tim në këtë lëndë. ☐ ☐ ☐ ☐ ☐ ☐

The course is useful for applying learning outcomes in my current work as teacher/ Moduli ishte i nevojshëm në aplikimin e rezultateve të të nxëniet në punën time aktuale si mësues/e. ☐ ☐ ☐ ☐ ☐ ☐

The practical activities were appropriate/ Aktivitetet praktike ishin të përshtatshme. ☐ ☐ ☐ ☐ ☐ ☐

Teaching methods encouraged participation/ Metodot e mësimdhënies inkurajojnë pjesmarrjen. ☐ ☐ ☐ ☐ ☐ ☐

15. TRAINER(S)/ TRAJNERI/ËT \* (1: Strongly disagree/ Nuk pajtohem aspak, 2: Disagree/ Nuk pajtohem, 3: Uncertain/ Jam i/e pasigurtë 4: Agree/ Pajtohem, 5: Strongly agree/ Pajtohem plotësisht)

Marca solo un óvalo por fila.

Not applicable/E paaplikueshme 1 2 3 4 5

The trainer(s) demonstrated in-depth knowledge of the subject/ Trajneri/ja demonstroi njohuri të thella të lëndës ☐ ☐ ☐ ☐ ☐ ☐

The trainer(s) encouraged discussions/ Trajneri/ja inkurajoi diskutimin ☐ ☐ ☐ ☐ ☐ ☐

The trainer(s) responded to questions/ Trajneri/ja i përgjigjej pyetjeve ☐ ☐ ☐ ☐ ☐ ☐

The trainer(s) gave guidance on where to find resources/ Trajneri/ja dha udhëzime se ku mund të gjejen burimet. ☐ ☐ ☐ ☐ ☐ ☐

16. FEEDBACK AND ASSESSMENT/ FEEDBACK-U DHE VLERËSIMI \* (1: Strongly disagree/ Nuk pajtohem aspak, 2: Disagree/ Nuk pajtohem, 3: Uncertain/ Jam i/e pasigurtë 4: Agree/ Pajtohem, 5: Strongly agree/ Pajtohem plotësisht)

Marca solo un óvalo por fila.

Not applicable/E paaplikueshme 1 2 3 4 5

Information about assessment was communicated clearly/ Informacioni rreth vlerësimit u komunikua qartësisht ☐ ☐ ☐ ☐ ☐ ☐

Feedback showed how to improve my work (e.g. corrections and comments)/ Fidbeku më tregoi si të përmirësoj punën time (psh korrigjimet dhe komentet) ☐ ☐ ☐ ☐ ☐ ☐

Feedback on assessment was timely/ Fidbeku për vlerësimin u kthye në kohë ☐ ☐ ☐ ☐ ☐ ☐

The methods of assessment related to the course learning outcomes/ Metodot e vlerësimit lidhen me rezultatet e të nxëniet të modulit ☐ ☐ ☐ ☐ ☐ ☐

17. 2.4. Please, indicate your level of satisfaction with the following aspects of the course you attended/ Ju lutemi, tregoni sa të kënaqur jeni ju me aspektet e mëposhtme të modulit që keni ndjekur.. \* (1: Very dissatisfied/ Shumë të pakënaqur, 2: Somewhat dissatisfied/ Deri diku të pakënaqur, 3: Neutral/ Neutral, 4: Somewhat satisfied/ Deri diku të kënaqur, 5: Very satisfied/ Shumë të kënaqur)

Marca solo un óvalo por fila.

1 2 3 4 5

Course content/ Përmbajtja e modulit ☐ ☐ ☐ ☐ ☐

Course organisation/ Organizimi i modulit ☐ ☐ ☐ ☐ ☐

Classroom/ Klasa ☐ ☐ ☐ ☐ ☐

Equipment (computers, internet, etc.)/ Pajisjet (kompjuterat/ internet) ☐ ☐ ☐ ☐ ☐

Learning documents/materials / Materialet dhe dokumentet e mësimorit ☐ ☐ ☐ ☐ ☐

Attendants' participation/ Prezenca e pjesmarrësve ☐ ☐ ☐ ☐ ☐

Teaching methods/ Metodot e mësimdhënies ☐ ☐ ☐ ☐ ☐

Trainer(s)/ Trajneri/trajnerët ☐ ☐ ☐ ☐ ☐

Feedback and assessment/ Feedback-u dhe vlerësimi ☐ ☐ ☐ ☐ ☐

Practical training (useful at work)/ Trajnimi praktik (i dobishëm në punë) ☐ ☐ ☐ ☐ ☐

Dates and timetable/ Datat dhe oraret ☐ ☐ ☐ ☐ ☐

Overall experience/ Eksperiencia e përgjithshme ☐ ☐ ☐ ☐ ☐

3. Evaluation of the course/ Vlerësimi i modulit

18. 3.1. This was a worthwhile course/ A ishte ky një modul i vlefshëm: \* Marca solo un óvalo.

☐ Yes / Po

☐ No / Jo

19. 3.2. If you could go back, would you enrol again in this course/ Nëse do të ktheheshit pas në kohë do ta ndiqnit këtë modul përsëri? \* Marca solo un óvalo.

☐ Yes / Po

☐ No / Jo

20. 3.3. Would you recommend this course to a colleague/ Do t'ja rekomandonit këtë modul kolegëve? \* Marca solo un óvalo.

☐ Yes / Po

☐ No / Jo

21. 3.4. Do you consider that the time of the year was suitable to attend the course/ Mendoni që kjo periudhë e vitit ishte e përshtatshme për të marrë pjesë në këtë modul? \* Marca solo un óvalo.

☐ Yes / Po

☐ No / Jo

22. 3.4.a If not, indicate the time of the year that suits you better/ Nëse jo, tregoni se cila periudhë e vitit do të ishte më e mira për ju: \_\_\_\_\_

23. 3.5. The best features of the course were/ Karakteristikat më të mira të modulit ishin: \_\_\_\_\_

24. 3.6. The course could have been improved by/ Moduli mund të ishte përmirësuar duke: \_\_\_\_\_

Thank you for taking the time to respond/ Faleminderit për përgjigjet!

"Developing teacher competences for a comprehensive VET system in Albania - TEAVET"

project is organised under Erasmus+ Programme, Key Action 2 – Capacity Building in the

Field of Higher Education 2017

Project Reference: 586300-ERP-1-2017-1-ES-EPKKA2-CBHE-SP
